# Supplementary material for: The Role of the Carnitine/Organic Cation Transporter Novel 2 in the Clinical Outcome of Patients With Locally Advanced Esophageal Carcinoma Treated With Oxaliplatin
Source: PubMed Central journal article supplement (PMC8481660; doi:10.3389/fphar.2021.684545), 2021-09-16
Supplement: Image1.pdf [file Image1.pdf]

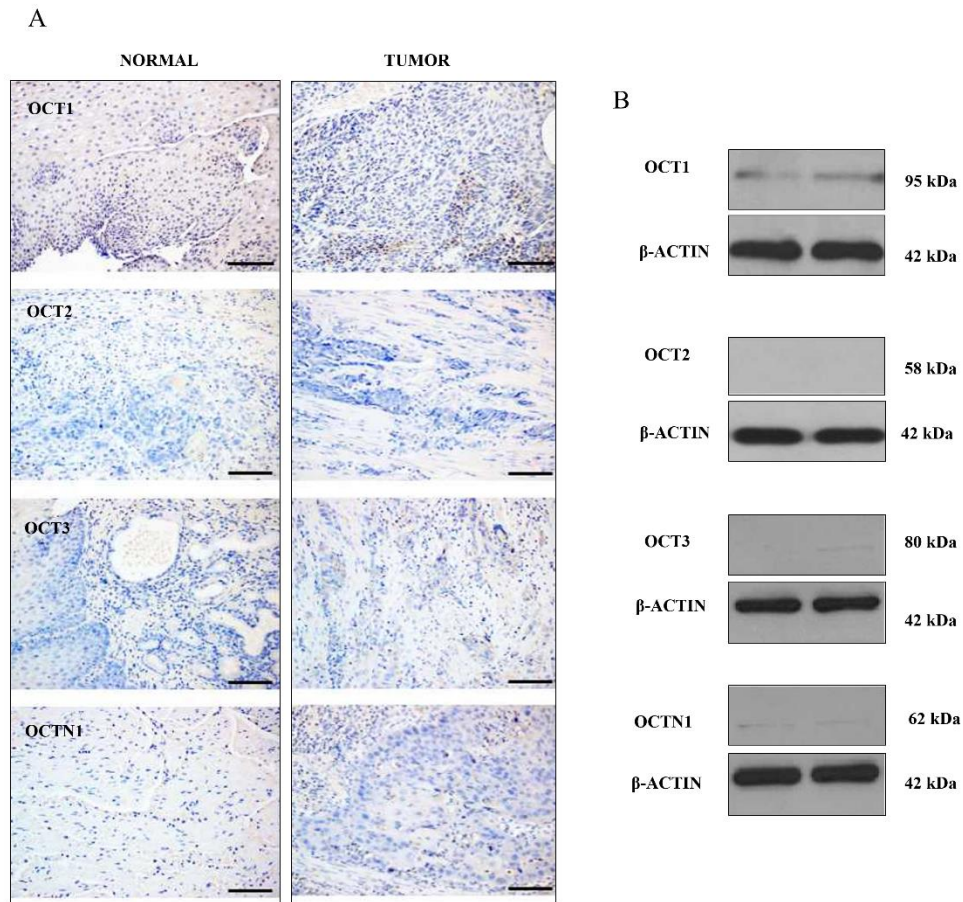

**Figure S1. Protein expression level of organic cation transporters in SCC samples.**

Representative images of the immunostaining for OCT1, OCT2, OCT3 and OCTN1 in matched adjacent normal tissues and tumor tissues from patients with SCC who underwent partial esophagectomy. Scale bar=100  $\mu$ m (A). Representative western blot of OCT1, OCT2, OCT3 and OCTN1 from matched adjacent normal tissue and tumor tissue of patients with SCC (B).
