# Supplementary material for: The Role of the Carnitine/Organic Cation Transporter Novel 2 in the Clinical Outcome of Patients With Locally Advanced Esophageal Carcinoma Treated With Oxaliplatin
Source: PubMed Central journal article supplement (PMC8481660; doi:10.3389/fphar.2021.684545), 2021-09-16
Supplement: Image2.pdf [file Image2.pdf]

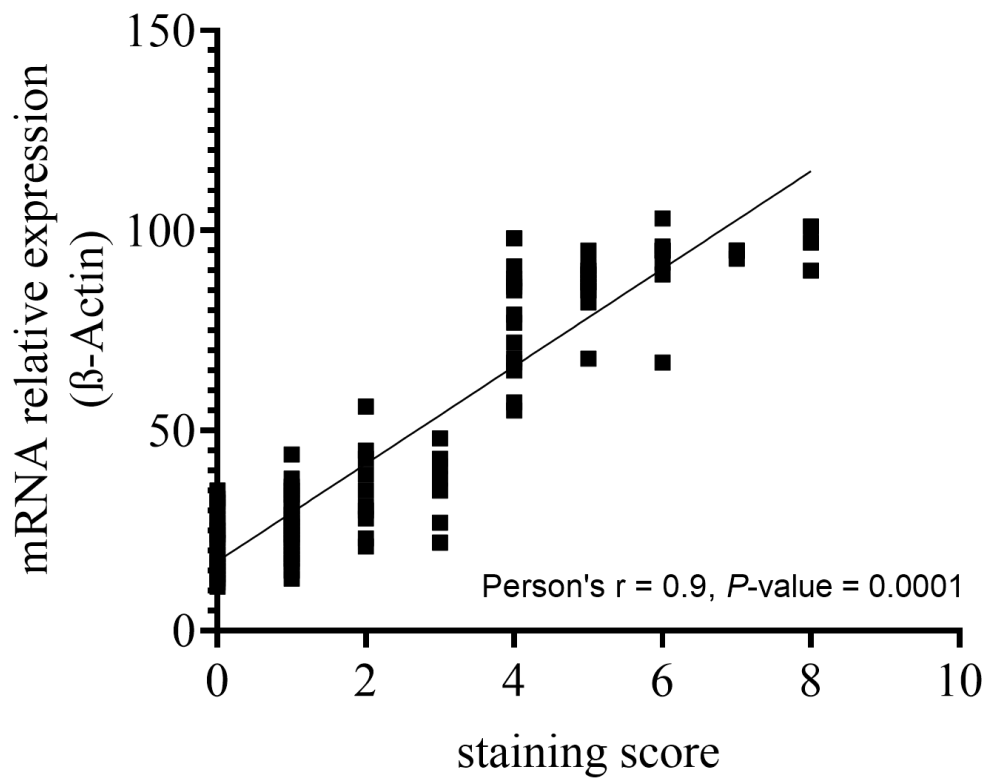

**Figure S2. Correlation between OCTN2 protein and mRNA level.** mRNA and protein level of 67 SCC samples and the matched normal tissues were correlated by Pearson's Rank - Order analysis.
